# Supplementary material for: Insulin-like Growth Factor II mRNA-Binding Protein 1 Regulates Pancreatic Cancer Cell Growth through the Surveillance of CDC25A mRNA
Source: MDPI journal article supplement (doi:10.3390/cancers15204983), 2023-10-13
Supplement: s1 [file s1]

Uncropped western blots

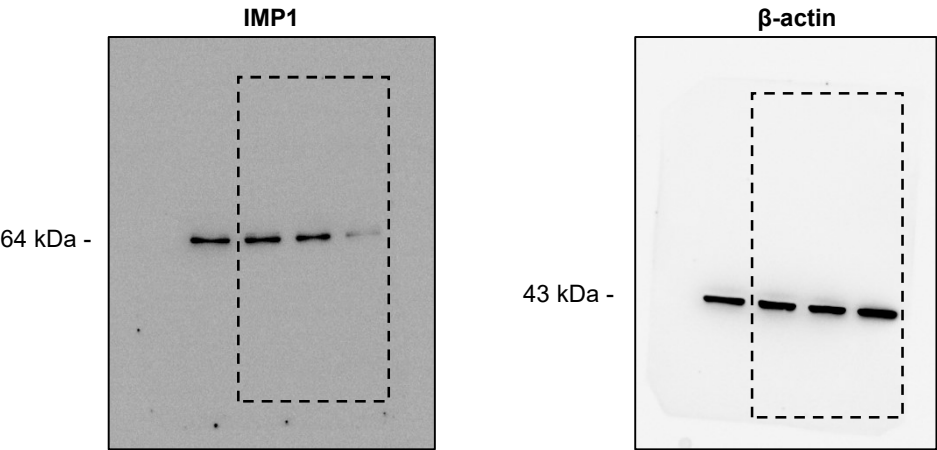

Figure 2A

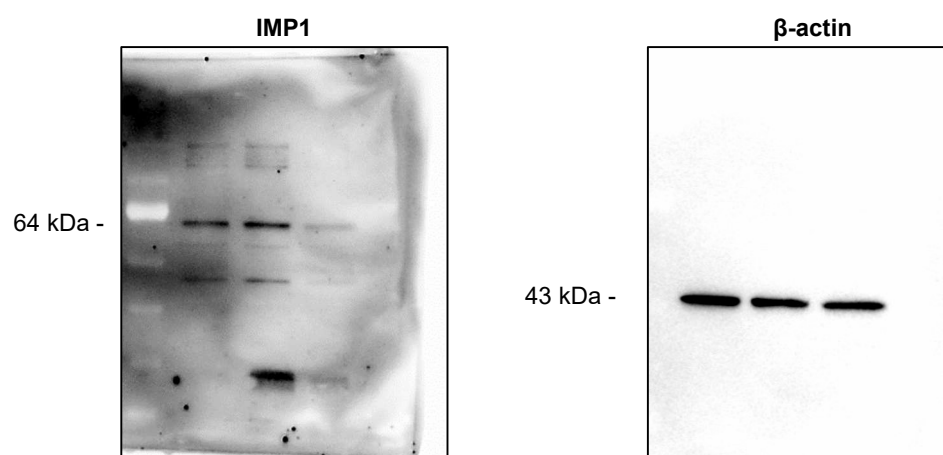

Figure 2B

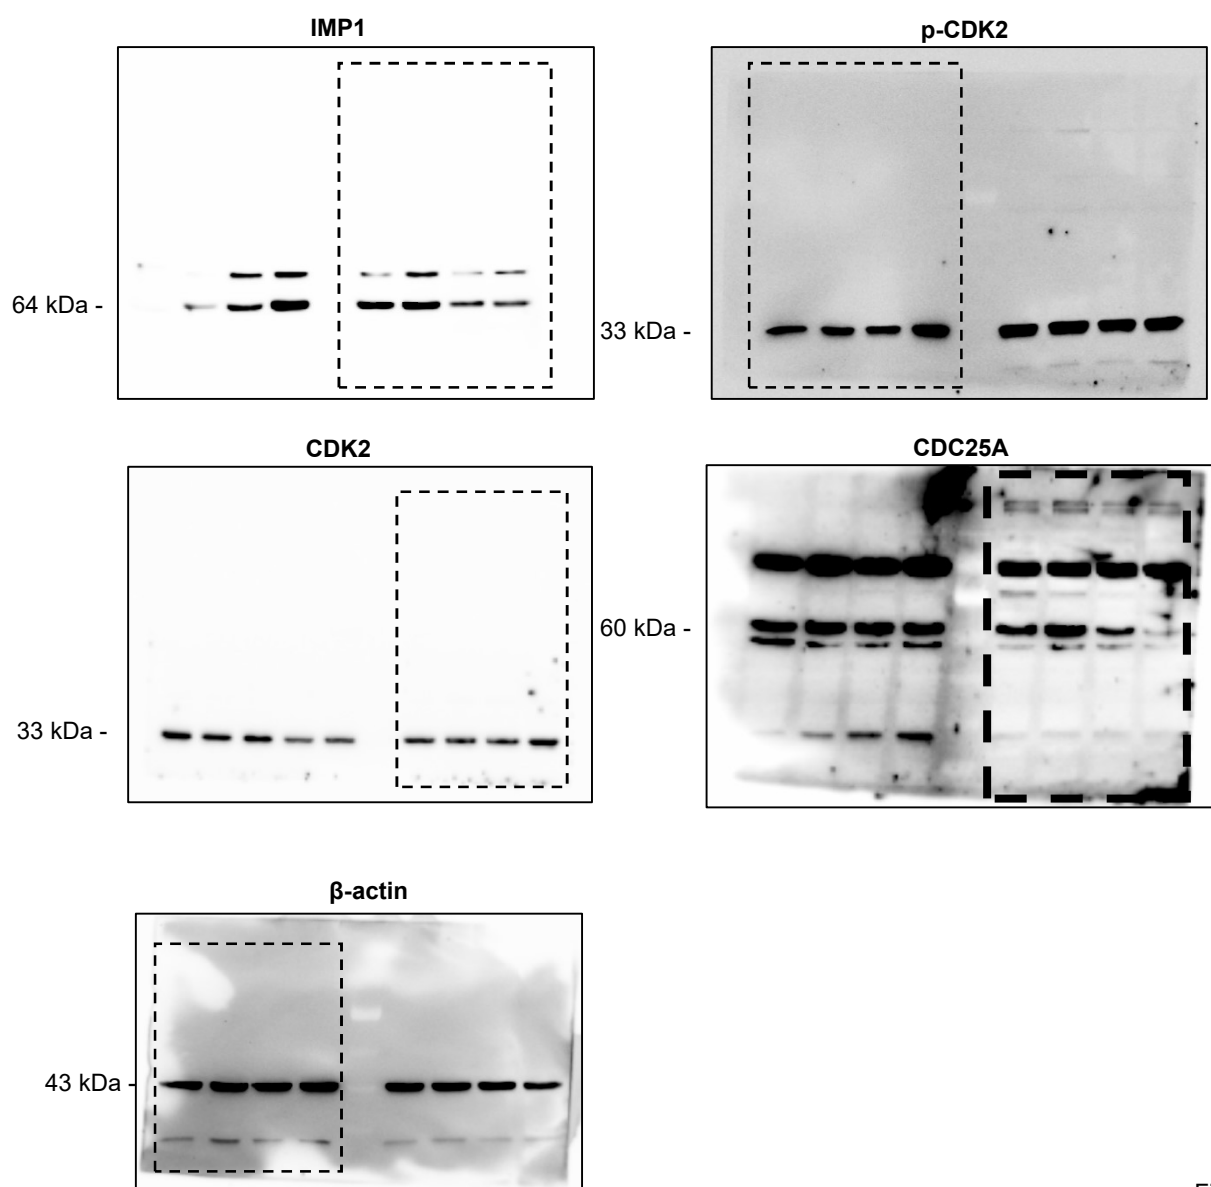

Figure 3C

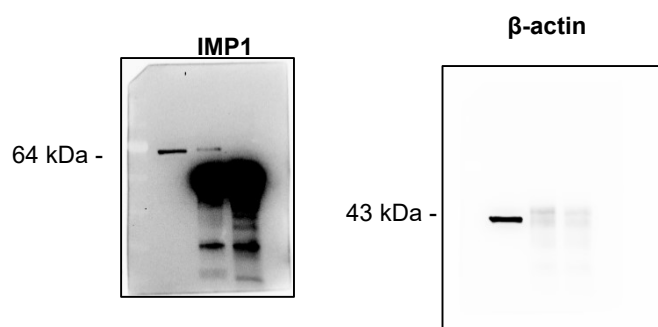

Figure 4A

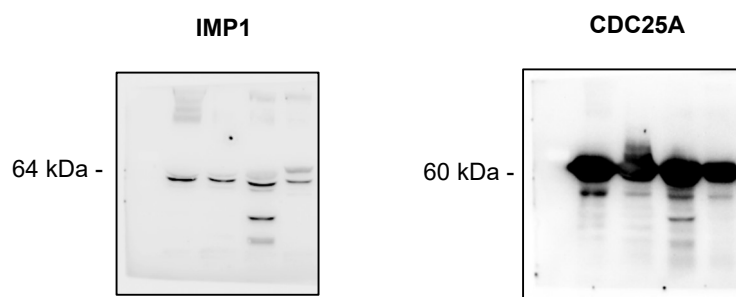

Figure 5C

# Supplemental Materials

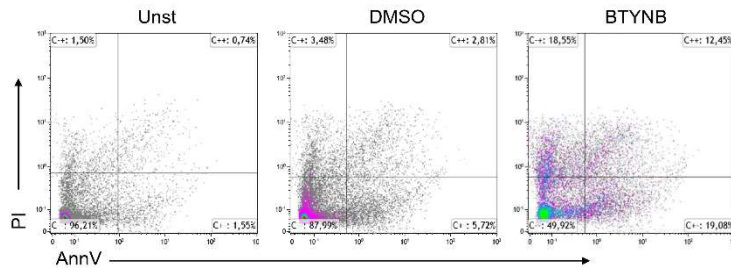

Supplemental Figure S1. Down-regulation of IMP1 activity increases cell death in PDAC cells. Flow cytometry analysis of Panc-1 cells treated with 10  $\mu$ M BTYNB or with a DMSO vehicle control for 48 hours and stained with Annexin V (AnnV) and propidium iodide (PI). One representative of 2 separate experiments are shown.

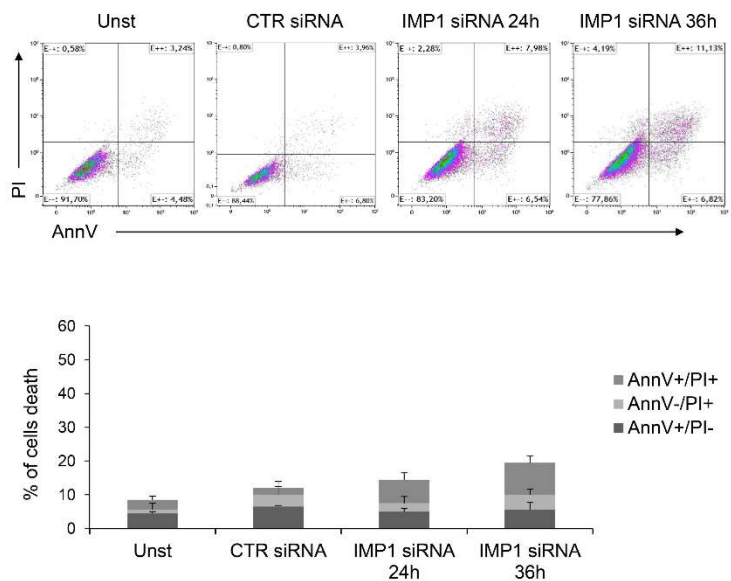

Supplemental Figure S2. Upper panels, flow cytometry analysis of Annexin V (AnnV) and propidium iodide (PI)-positive Panc-1 cells treated unstimulated (Unst) or transfected with control siRNA (36h) or IMP1 siRNA (final concentration 25nM) for 24 or 36 hours; lower panel, quantification of AnnV and/or PI-positive Panc-1 cells (mean  $\pm$  SEM; n = 3).

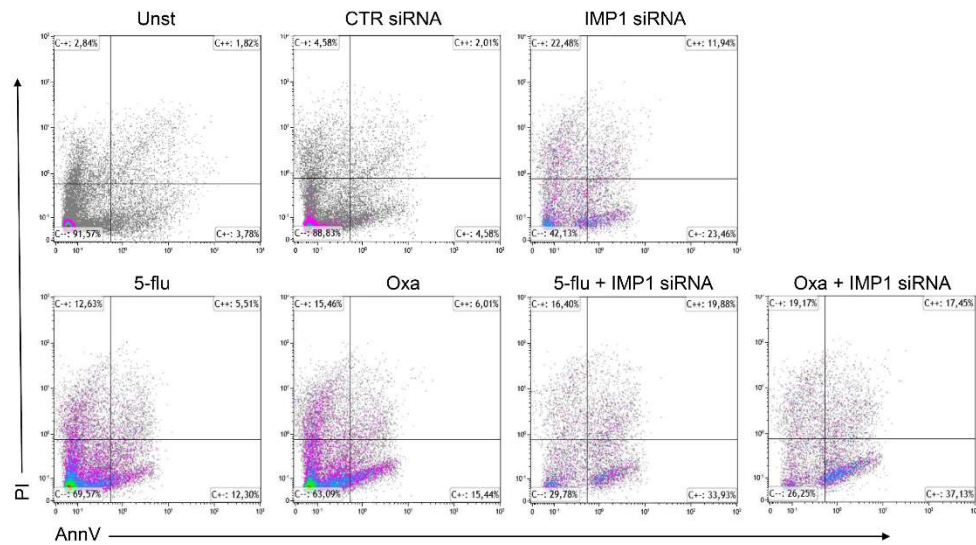

Supplemental Figure S3. IMP1 knockdown enhances the toxicity of chemotherapeutic drugs. Representative dot-plots (upper panels) and quantification percentage (lower panel) showing the AnnexinV- and/or propidium iodide (PI)-positive Panc-1 cells pre-incubated with control or IMP1 siRNA (both final concentration 25 nM) for 12 h and then stimulated or not with 5-fluorouracil (5-flu, 10 $\mu$ M final concentration) or oxaliplatin (Oxa, 10 $\mu$ M final concentration) for further 36 h. One representative of 2 separate experiments are shown.
